# Supplementary material
Source: PubMed Central journal article supplement (PMC5698136)
Supplement: NIHMS904966-supplement-Data_Supplement.pdf [file NIHMS904966-supplement-Data_Supplement.pdf]

**Supplemental Table 1. Sensitivities and Specificities for CAC and Functional Testing**

|                                               | Sensitivity (95% CI) |                    |         | Specificity (95% CI) |                    |         |
|-----------------------------------------------|----------------------|--------------------|---------|----------------------|--------------------|---------|
|                                               | CAC Testing          | Functional testing | p-value | CAC Testing          | Functional testing | p-value |
| <b>All-cause death/MI/UA</b>                  |                      |                    |         |                      |                    |         |
| Abnormal:<br>(CAC>0; FT=mild/moderate/severe) | 84.2% (76.9–90.0)    | 43.2% (34.6–52.1)  | <0.001  | 35.2% (33.8–36.7)    | 78.6% (77.4–79.8)  | <0.001  |
| Abnormal:<br>(CAC>100; FT=moderate/severe)    | 60.9% (52.1–69.2)    | 36.4% (28.2–45.2)  | <0.001  | 67.3% (65.9–68.8)    | 88.1% (87.1–89.0)  | <0.001  |
| Abnormal:<br>(CAC>400; FT=severe)             | 30.8% (23.1–39.4)    | 26.5% (19.2–34.9)  | 0.498   | 85.3% (84.2–86.4)    | 92.6% (91.8–93.4)  | <0.001  |
| <b>Cardiovascular death/MI/UA</b>             |                      |                    |         |                      |                    |         |
| Abnormal:<br>(CAC>0; FT=mild/moderate/severe) | 86.8% (78.8–92.6)    | 48.1% (38.4–58.0)  | <0.001  | 35.2% (33.7–36.7)    | 78.6% (77.4–79.8)  | <0.001  |
| Abnormal:<br>(CAC>100; FT=moderate/severe)    | 63.2% (53.3–72.4)    | 40.7% (31.4–50.6)  | 0.001   | 67.2% (65.8–68.7)    | 88.0% (87.0–89.0)  | <0.001  |
| Abnormal:<br>(CAC>400; FT=severe)             | 33.0% (24.2–42.8)    | 28.7% (20.4–38.2)  | 0.555   | 85.3% (84.1–86.3)    | 92.6% (91.8–93.3)  | <0.001  |
| <b>Cardiovascular death/MI</b>                |                      |                    |         |                      |                    |         |
| Abnormal:<br>(CAC>0; FT=mild/moderate/severe) | 83.0% (70.2–91.9)    | 33.3% (22.7–45.4)  | <0.001  | 34.8% (33.4–36.3)    | 78.1% (76.9–79.3)  | <0.001  |
| Abnormal:<br>(CAC>100; FT=moderate/severe)    | 50.9% (36.8–64.9)    | 26.4% (16.7–38.1)  | 0.008   | 66.7% (65.2–68.1)    | 87.6% (86.6–88.5)  | <0.001  |
| Abnormal:<br>(CAC>400; FT=severe)             | 24.5% (13.8–38.3)    | 19.4% (11.1–30.5)  | 0.517   | 84.9% (83.8–88.3)    | 92.3% (91.4–93.0)  | <0.001  |

MI indicates myocardial infarction; UA, unstable angina.

**Supplemental Table 2: Alternative Cutpoints for CAC—Frequency of Test Findings and Association With Clinical Events for CAC Testing**

| Initial Test Results                | CAC Testing<br>(N=4209) |                       |                     |         | Functional Testing<br>(N=4602) |                       |                     |         |
|-------------------------------------|-------------------------|-----------------------|---------------------|---------|--------------------------------|-----------------------|---------------------|---------|
|                                     | Frequency<br>n/N (%)    | Event Rate<br>n/N (%) | HR* (95%<br>CI)     | P-value | Frequency<br>n/N (%)           | Event Rate<br>n/N (%) | HR* (95% CI)        | P-value |
| <b>All-cause death/MI/UA</b>        |                         |                       |                     |         |                                |                       |                     |         |
| Normal (CAC 0, FT = normal)         | 1457/4209<br>(34.6)     | 21/1457 (1.44)        |                     |         | 3588/4602<br>(78.0)            | 75/3588 (2.1)         |                     |         |
| Mild (CAC 1-99, FT = mild)          | 1340/4209<br>(31.8)     | 31/1340 (2.31)        | 1.51<br>(0.86–2.64) | 0.149   | 432/4602<br>(9.4)              | 9/432 (2.1)           | 0.94<br>(0.47–1.89) | 0.867   |
| Moderate (CAC 100-300, FT moderate) | 621/4209<br>(14.8)      | 32/621 (5.15)         | 3.18<br>(1.80–5.62) | <0.001  | 217/4602<br>(4.7)              | 13/217 (6.0)          | 2.65<br>(1.46–4.83) | 0.001   |
| Severe (CAC >300, FT Severe)        | 791/4209<br>(18.8)      | 49/791 (6.19)         | 3.42<br>(1.95–5.99) | <0.001  | 365/4602<br>(7.9)              | 35/365 (9.6)          | 3.88<br>(2.58–5.85) | <0.001  |
| <b>Cardiovascular death/MI/UA</b>   |                         |                       |                     |         |                                |                       |                     |         |
| Normal (CAC 0, FT = normal)         | 1457/4209<br>(34.6)     | 14/1457 (0.96)        |                     |         | 3588/4602<br>(78.0)            | 56/3588 (1.6)         |                     |         |
| Mild (CAC 1-99, FT = mild)          | 1340/4209<br>(31.8)     | 25/1340 (1.87)        | 1.84<br>(0.95–3.56) | 0.070   | 432/4602<br>(9.4)              | 8/432 (1.9)           | 1.11<br>(0.53–2.34) | 0.783   |
| Moderate (CAC 100-300, FT moderate) | 621/4209<br>(14.8)      | 27/621 (4.35)         | 4.08<br>(2.10–7.93) | <0.001  | 217/4602<br>(4.7)              | 13/217 (6.0)          | 3.50<br>(1.89–6.48) | <0.001  |
| Severe (CAC >300, FT Severe)        | 791/4209<br>(18.8)      | 40/791 (5.06)         | 4.29<br>(2.22–8.30) | <0.001  | 365/4602<br>(7.9)              | 31/365 (8.5)          | 4.59<br>(2.93–7.19) | <0.001  |
| <b>Cardiovascular death/MI</b>      |                         |                       |                     |         |                                |                       |                     |         |
| Normal (CAC <0, FT = normal)        | 1457/4209<br>(34.6)     | 9/1457 (0.62)         |                     |         | 3588/4602<br>(78.0)            | 48/3588 (1.3)         |                     |         |
| Mild (CAC 1-99, FT = mild)          | 1340/4209<br>(31.8)     | 17/1340 (1.27)        | 1.77<br>(0.78–4.02) | 0.171   | 432/4602<br>(9.4)              | 5/432 (1.2)           | 0.81<br>(0.32–2.04) | 0.654   |
| Moderate (CAC 100-300, FT moderate) | 621/4209<br>(14.8)      | 11/621 (1.77)         | 2.17<br>(0.87–5.41) | 0.095   | 217/4602<br>(4.7)              | 5/217 (2.3)           | 1.53<br>(0.60–3.90) | 0.368   |

**SUPPLEMENTAL TABLES**  
DOI: 10.1161/CIRCULATIONAHA.117.030578

| <b>Initial Test Results</b>  | <b>CAC Testing<br/>(N=4209)</b> |                               |                         |                | <b>Functional Testing<br/>(N=4602)</b> |                               |                     |                |
|------------------------------|---------------------------------|-------------------------------|-------------------------|----------------|----------------------------------------|-------------------------------|---------------------|----------------|
|                              | <b>Frequency<br/>n/N (%)</b>    | <b>Event Rate<br/>n/N (%)</b> | <b>HR* (95%<br/>CI)</b> | <b>P-value</b> | <b>Frequency<br/>n/N (%)</b>           | <b>Event Rate<br/>n/N (%)</b> | <b>HR* (95% CI)</b> | <b>P-value</b> |
| Severe (CAC >300, FT Severe) | 791/4209<br>(18.8)              | 16/791 (2.02)                 | 2.00<br>(0.82–4.89)     | 0.130          | 365/4602<br>(7.9)                      | 14/365 (3.8)                  | 2.13<br>(1.16–3.91) | 0.014          |

\* Hazard ratios (HR) adjusted for age, sex, CAD risk equivalent (history of either diabetes mellitus, peripheral artery disease, or cerebrovascular disease), and the prespecification of the intended functional test (if randomly assigned to the functional testing arm).

**Supplemental Table 3: Alternative Cutpoints for CAC—Frequency of Test Findings and Association With Clinical Events for CAC Testing**

| Initial Test Results                | CAC Testing<br>(N=4209) |                       |                     |         | Functional Testing<br>(N=4602) |                       |                     |         |
|-------------------------------------|-------------------------|-----------------------|---------------------|---------|--------------------------------|-----------------------|---------------------|---------|
|                                     | Frequency<br>n/N (%)    | Event Rate<br>n/N (%) | HR* (95%<br>CI)     | P-value | Frequency<br>n/N (%)           | Event Rate<br>n/N (%) | HR* (95% CI)        | P-value |
| <b>All-cause death/MI/UA</b>        |                         |                       |                     |         |                                |                       |                     |         |
| Normal (CAC <10, FT = normal)       | 1831/4209<br>(43.5)     | 28/1831 (1.53)        |                     |         | 3588/4602<br>(78.0)            | 75/3588 (2.1)         |                     |         |
| Mild (CAC 10-99, FT = mild)         | 966/4209<br>(23.0)      | 24/966 (2.48)         | 1.52<br>(0.87–2.63) | 0.139   | 432/4602<br>(9.4)              | 9/432 (2.1)           | 0.94<br>(0.47–1.89) | 0.867   |
| Moderate (CAC 100-400, FT moderate) | 621/4209<br>(14.8)      | 32/621 (5.15)         | 3.02<br>(1.79–5.10) | <0.001  | 217/4602<br>(4.7)              | 13/217 (6.0)          | 2.65<br>(1.46–4.83) | 0.001   |
| Severe (CAC >400, FT Severe)        | 791/4209<br>(18.8)      | 49/791 (6.19)         | 3.24<br>(1.94–5.42) | <0.001  | 365/4602<br>(7.9)              | 35/365 (9.6)          | 3.88<br>(2.58–5.85) | <0.001  |
| <b>Cardiovascular death/MI/UA</b>   |                         |                       |                     |         |                                |                       |                     |         |
| Normal (CAC <10, FT = normal)       | 1831/4209<br>(43.5)     | 18/1831 (0.98)        |                     |         | 3588/4602<br>(78.0)            | 56/3588 (1.6)         |                     |         |
| Mild (CAC 10-99, FT = mild)         | 966/4209<br>(23.0)      | 21/966 (2.17)         | 2.08<br>(1.10–3.94) | 0.024   | 432/4602<br>(9.4)              | 8/432 (1.9)           | 1.11<br>(0.53–2.34) | 0.783   |
| Moderate (CAC 100-400, FT moderate) | 621/4209<br>(14.8)      | 27/621 (4.35)         | 4.02<br>(2.17–7.44) | <0.001  | 217/4602<br>(4.7)              | 13/217 (6.0)          | 3.50<br>(1.89–6.48) | <0.001  |
| Severe (CAC >400, FT Severe)        | 791/4209<br>(18.8)      | 40/791 (5.06)         | 4.25<br>(2.31–7.81) | <0.001  | 365/4602<br>(7.9)              | 31/365 (8.5)          | 4.59<br>(2.93–7.19) | <0.001  |
| <b>Cardiovascular death/MI</b>      |                         |                       |                     |         |                                |                       |                     |         |
| Normal (CAC <10, FT = normal)       | 1831/4209<br>(43.5)     | 12/1831 (0.66)        |                     |         | 3588/4602<br>(78.0)            | 48/3588 (1.3)         |                     |         |
| Mild (CAC 10-99, FT = mild)         | 966/4209<br>(23.0)      | 14/966 (1.45)         | 1.88<br>(0.86–4.11) | 0.155   | 432/4602<br>(9.4)              | 5/432 (1.2)           | 0.81<br>(0.32–2.04) | 0.654   |
| Moderate (CAC 100-400, FT moderate) | 621/4209<br>(14.8)      | 11/621 (1.77)         | 2.08<br>(0.89–4.86) | 0.089   | 217/4602<br>(4.7)              | 5/217 (2.3)           | 1.53<br>(0.60–3.90) | 0.368   |

**SUPPLEMENTAL TABLES**  
DOI: 10.1161/CIRCULATIONAHA.117.030578

| <b>Initial Test Results</b>  | <b>CAC Testing<br/>(N=4209)</b> |                               |                         |                | <b>Functional Testing<br/>(N=4602)</b> |                               |                     |                |
|------------------------------|---------------------------------|-------------------------------|-------------------------|----------------|----------------------------------------|-------------------------------|---------------------|----------------|
|                              | <b>Frequency<br/>n/N (%)</b>    | <b>Event Rate<br/>n/N (%)</b> | <b>HR* (95%<br/>CI)</b> | <b>P-value</b> | <b>Frequency<br/>n/N (%)</b>           | <b>Event Rate<br/>n/N (%)</b> | <b>HR* (95% CI)</b> | <b>P-value</b> |
| Severe (CAC >400, FT Severe) | 791/4209<br>(18.8)              | 16/791 (2.02)                 | 1.92<br>(0.84–4.39)     | 0.122          | 365/4602<br>(7.9)                      | 14/365 (3.8)                  | 2.13<br>(1.16–3.91) | 0.014          |

\* Hazard ratios (HR) adjusted for age, sex, CAD risk equivalent (history of either diabetes mellitus, peripheral artery disease, or cerebrovascular disease), and the prespecification of the intended functional test (if randomly assigned to the functional testing arm).

**Supplemental Table 4. Frequency of Abnormal and Normal Test Findings and Association With Clinical Events for Anatomic and**

| <b>Initial Test Results</b>                  | <b>CAC Testing<br/>(N=4209)</b> |                               |                         |                     | <b>Functional Testing<br/>(N=4602)</b> |                               |                         |                |
|----------------------------------------------|---------------------------------|-------------------------------|-------------------------|---------------------|----------------------------------------|-------------------------------|-------------------------|----------------|
|                                              | <b>Frequency<br/>n/N (%)</b>    | <b>Event Rate<br/>n/N (%)</b> | <b>HR*<br/>(95% CI)</b> | <b>P-<br/>value</b> | <b>Frequency<br/>n/N (%)</b>           | <b>Event Rate<br/>n/N (%)</b> | <b>HR* (95%<br/>CI)</b> | <b>P-value</b> |
| <b>All-cause death/MI/UA</b>                 |                                 |                               |                         |                     |                                        |                               |                         |                |
| Normal (CAC=0; FT=normal)                    | 1457/4209<br>(34.62)            | 21/1457 (1.44)                |                         |                     | 3588/4602<br>(77.97)                   | 75/3588 (2.09)                |                         |                |
| Abnormal<br>(CAC>0; FT=mild/moderate/severe) | 2752/4209<br>(65.38)            | 112/2752 (4.07)               | 2.30 (1.41–<br>3.74)    | 0.001               | 1014/4602<br>(22.03)                   | 57/1014 (5.62)                | 2.42 (1.70–<br>3.44)    | <0.001         |
| <b>Cardiovascular death/MI/UA</b>            |                                 |                               |                         |                     |                                        |                               |                         |                |
| Normal (CAC=0; FT=normal)                    | 1457/4209<br>(34.62)            | 14/1457 (0.96)                |                         |                     | 3588/4602<br>(77.97)                   | 56/3588 (1.56)                |                         |                |
| Abnormal<br>(CAC>0; FT=mild/moderate/severe) | 2752/4209<br>(65.38)            | 92/2752 (3.34)                | 2.86 (1.60–<br>5.13)    | <0.001              | 1014/4602<br>(22.03)                   | 52/1014 (5.13)                | 2.93 (2.00–<br>4.30)    | <0.001         |
| <b>Cardiovascular death/MI</b>               |                                 |                               |                         |                     |                                        |                               |                         |                |
| Normal (CAC=0; FT=normal)                    | 1457/4209<br>(34.62)            | 9/1457 (0.62)                 |                         |                     | 3588/4602<br>(77.97)                   | 48/3588 (1.34)                |                         |                |
| Abnormal<br>(CAC>0; FT=mild/moderate/severe) | 2752/4209<br>(65.38)            | 44/2752 (1.60)                | 1.92 (0.90–<br>4.07)    | 0.090               | 1014/4602<br>(22.03)                   | 24/1014 (2.37)                | 1.50 (0.91–<br>2.46)    | 0.112          |

**Functional Testing.**

MI indicates myocardial infarction; UA, unstable angina.

\* Hazard ratios (HR) adjusted for age, sex, CAD risk equivalent (history of either diabetes mellitus, peripheral artery disease, or cerebrovascular disease), and the prespecification of the intended functional test (if randomly assigned to the functional testing arm).
